# Supplementary material for: Unleashing the Potential of Geostationary Satellite Observations in Air Quality Forecasting Through Artificial Intelligence Techniques
Source: Copernicus journal article supplement (doi:10.5194/egusphere-2024-2620), 2024-08-30
Supplement: Supplementary file 1 [file egusphere-2024-2620-supplement.pdf]

1 **Supplement Information for**

2 **Unleashing the Potential of Geostationary Satellite Observations in Air**  
3 **Quality Forecasting Through Artificial Intelligence Techniques**

4 Chengxin Zhang<sup>1</sup>, Xinhao Niu<sup>1</sup>, Hongyu Wu<sup>2</sup>, Zhipeng Ding<sup>2</sup>, Ka Lok Chan<sup>3</sup>, Jhoon Kim<sup>4</sup>,  
5 Thomas Wagner<sup>5</sup>, Cheng Liu<sup>1,6,7\*</sup>

6 <sup>1</sup>Department of Precision Machinery and Precision Instrumentation, University of Science and  
7 Technology of China, Hefei, 230026, China

8 <sup>2</sup>School of Environmental Science and Optoelectronic Technology, University of Science and  
9 Technology of China, Hefei, 230026, China

10 <sup>3</sup>Rutherford Appleton Laboratory Space, Harwell Oxford, United Kingdom

11 <sup>4</sup>Department of Atmospheric Sciences, Yonsei University, Seoul, Republic of Korea

12 <sup>5</sup>Satellite Remote Sensing Group, Max Planck Institute for Chemistry, Mainz, Germany

13 <sup>6</sup>Key Laboratory of Environmental Optics and Technology, Anhui Institute of Optics and Fine  
14 Mechanics, Chinese Academy of Sciences, Hefei, 230031, China

15 <sup>7</sup>Key Laboratory of Precision Scientific Instrumentation of Anhui Higher Education Institutes,  
16 University of Science and Technology of China, Hefei, 230026, China

17

18 \*Correspondence: Cheng Liu ([chliu81@ustc.edu.cn](mailto:chliu81@ustc.edu.cn))

19

20 **This file contains supplementary text S1-S2 and figures S1-S12.**

21

## 22 **Supplementary Text**

### 23 **S1. Data pre-processing**

#### 24 **Outlier Handling**

25 We conducted outlier handling for each GeoNet input datasets using z-scores, wherein data  
26 normalization was performed based on the mean and standard deviation. Data points exceeding  
27 a certain threshold of z-scores were discarded. The calculation formula is as follows:

$$28 \quad z(x) = \frac{x - \mu_x}{\sigma_x}$$

29 Where  $x$  is the data value,  $\mu_x$  and  $\sigma_x$  are the mean average and standard deviation.

#### 30 **Missing Value Handling**

31 Due to meteorological factors, the GEMS dataset used in this study contains many missing  
32 values. Fig. S1 presents the overall missing ratio of GEMS satellite NO<sub>2</sub> retrieval for each  
33 ground pixel in 2021.

34 To enhance data availability, the GEMS dataset underwent imputation procedures. Various  
35 data imputation methods were employed to assess their impact on the dataset, including zero  
36 imputation, WRF data imputation, and CAMS data imputation. Specifically, missing data  
37 points were replaced with either zero or corresponding data from the WRF and CAMS datasets  
38 at the respective spatiotemporal positions. For other datasets, missing values were addressed  
39 through spatiotemporal interpolation using multidimensional linear interpolation.

#### 40 **Resampling**

41 Due to variations in spatiotemporal resolutions among different datasets, it was necessary to  
42 ensure data consistency and facilitate model computation by resampling all datasets in both  
43 time and space domains. Resampling operations involved both upsampling and downsampling.  
44 Upsampling was achieved through interpolation, while downsampling was performed using  
45 local mean aggregation. Following resampling, the temporal resolution of all datasets was  
46 standardized to 1 hour, and the spatial resolution to 0.1 degrees.

#### 47 **Normalization**

48 The normalization process applied here is beneficial for overcoming overfitting issues during  
49 model training and dealing with heterogeneous data of different scales, thereby potentially  
50 accelerating training speed. This process is essential for bringing each variable to a comparable  
51 scale, ensuring that each feature carries similar importance. In this study, min-max  
52 normalization was applied to all datasets. In this method, the maximum value of the data is

53 transformed to 1, the minimum value to 0, and other values are scaled to decimals between 0  
54 and 1. The calculation method is as follows:

55 
$$x_n = \frac{x - x_{min}}{x_{max} - x_{min}}$$

56 Where  $x$ ,  $x_{max}$ ,  $x_{min}$  is the data value, maximum, and minimum, respectively.

57

## 58 **S2. The configuration and optimization of GeoNet**

59 For the GeoNet model, the model configurations and hyperparameters such as the optimizer,  
60 loss function, L1 or L2 regularization, dropout, training steps, and epochs can make a  
61 difference to the model performance including the prediction accuracy and generalizability.  
62 Thus, several scenarios of model hyper-parameters have been tested during the model training  
63 phase. The model accuracy on validation datasets and the learning rate curve were used to  
64 diagnose the model hyperparameters. We used the following metrics of model performance in  
65 this study:

66 The coefficient of determination ( $R^2$ ):

67 
$$R^2 = \frac{\sum_{i=1}^m (f(x_i) - \bar{y})^2}{\sum_{i=1}^m (y_i - \bar{y})^2}$$

68 The root mean square error (RMSE):

69 
$$\sqrt{\frac{1}{n} \sum_{i=1}^n (\hat{y}_i - y_i)^2}$$

70 The mean absolute error (MAE):

71 
$$\frac{1}{n} \sum_{i=1}^n |\hat{y}_i - y_i|$$

72 The mean absolute percentage error (MAPE):

73 
$$\frac{1}{n} \sum_{i=1}^n \left| \frac{\hat{y}_i - y_i}{y_i} \right|$$

74 The model parameters mainly include the number of layers and the dimensions of the hidden  
75 layers, both control the model's capacity. If the model capacity is relatively small, underfitting  
76 may occur; overfitting may exist if it is too large. Therefore, selecting an appropriate model  
77 capacity is crucial for improving model performance. During the pre-training process, the  
78 model is trained by combining different numbers of layers and dimensions of the hidden layers.  
79 The Mean Squared Error (MSE) Loss is recorded for each training iteration, and a heatmap is

80 generated as shown in Fig. S2. From the heatmap, it can be observed that when the number of  
81 layers is 2 and the dimension of the hidden layer is 256, the model achieves the minimum MSE  
82 Loss. Fig. S3 shows the sensitivity test results of model loss varying with different batch size  
83 settings, indicating that a batch size of 64 is optimal. Based on the model's MSE loss under  
84 different hyperparameter configurations, the best fitting model can be selected.

85 The Adam optimization algorithm controls the learning rate, which can design independent  
86 adaptive learning rates for different parameters. The three initialization parameters  $\epsilon$ ,  $\rho_1$ , and  
87  $\rho_2$  of the Adam algorithm are set to be 0.0001, 0.9, and 0.99, respectively. For the epoch, its  
88 size is controlled by the early stop method. The early stop method monitors the change of the  
89 model's loss function on the validation set during the training process and stops the model  
90 training immediately when the validation loss of the model starts to become larger. Due to the  
91 fluctuation of the loss function, a threshold  $p$  is set for the early stopping method in practice,  
92 and when the validation loss of the model becomes large for  $p$  consecutive epochs, the model  
93 is rolled back to the lowest validation loss and the training is stopped, and the threshold  $p$  is set  
94 to 10 in this paper. Fig. S4 shows a typical learning curve of the MSE loss in training and  
95 validation data sets for different learning steps in training an optimal model. Such diagnostics  
96 can be used to avoid the model overfitting.

97

98

99 **Supplementary Figures**

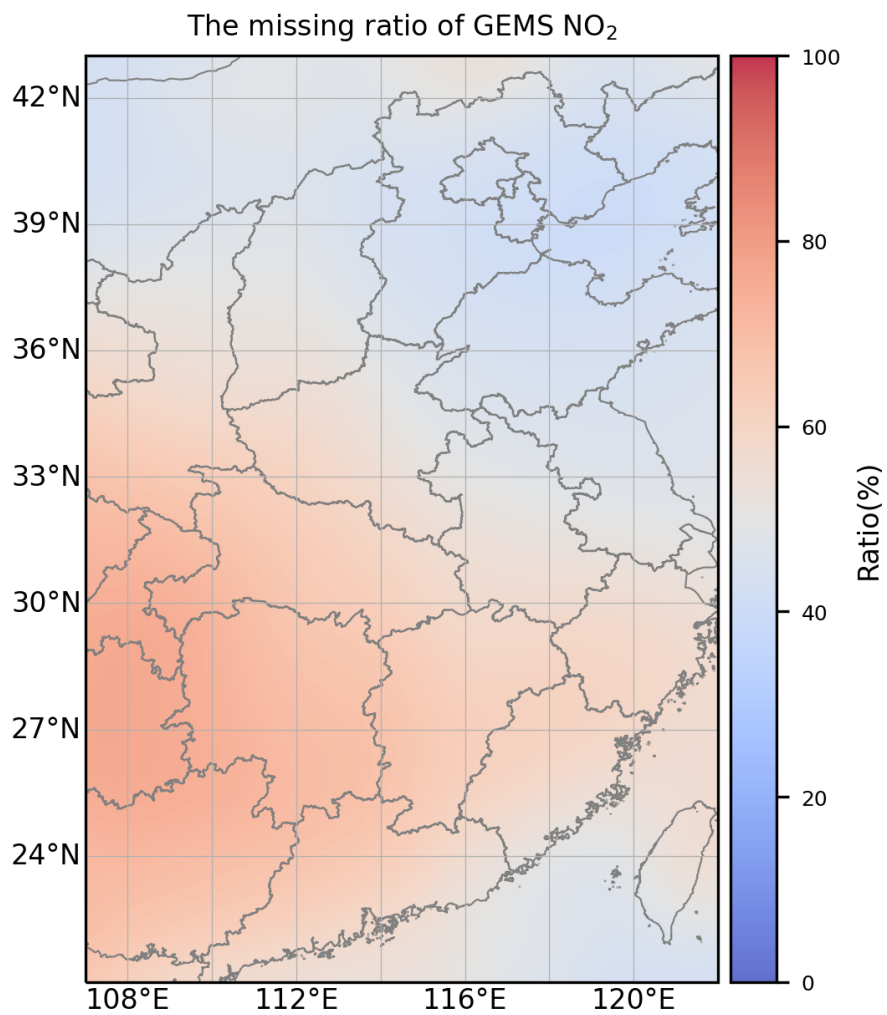

100

101 **Figure S1.** The ratio of missing data for hourly GEMS NO<sub>2</sub> retrievals over East China in 2021.

102

103

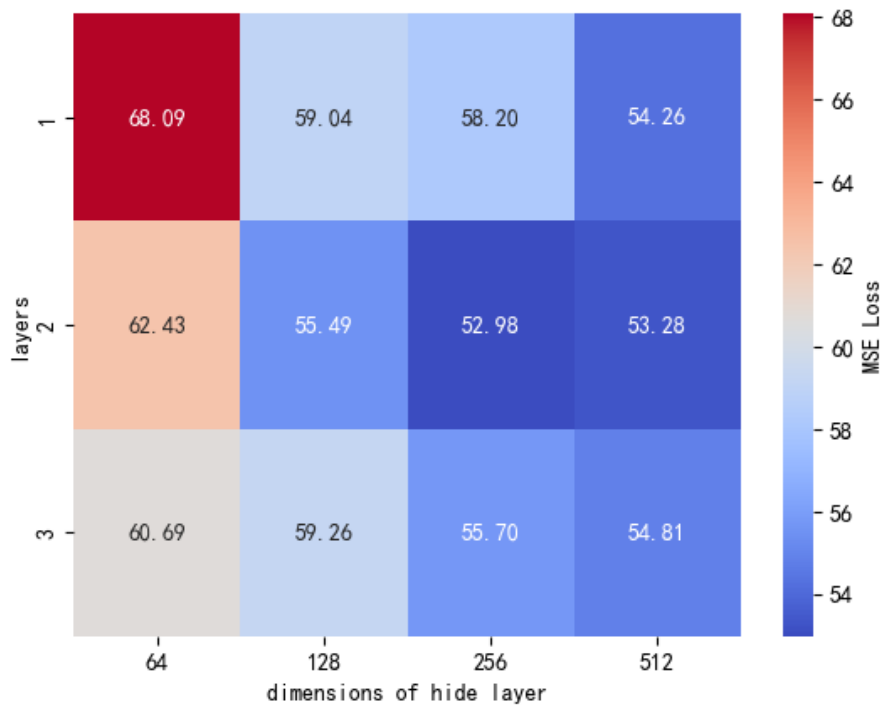

104

105 **Figure S2.** The influence of model hyperparameters including both ConvLSTM layers and dimensions of  
106 hidden layer on the MSE loss of GeoNet prediction.

107

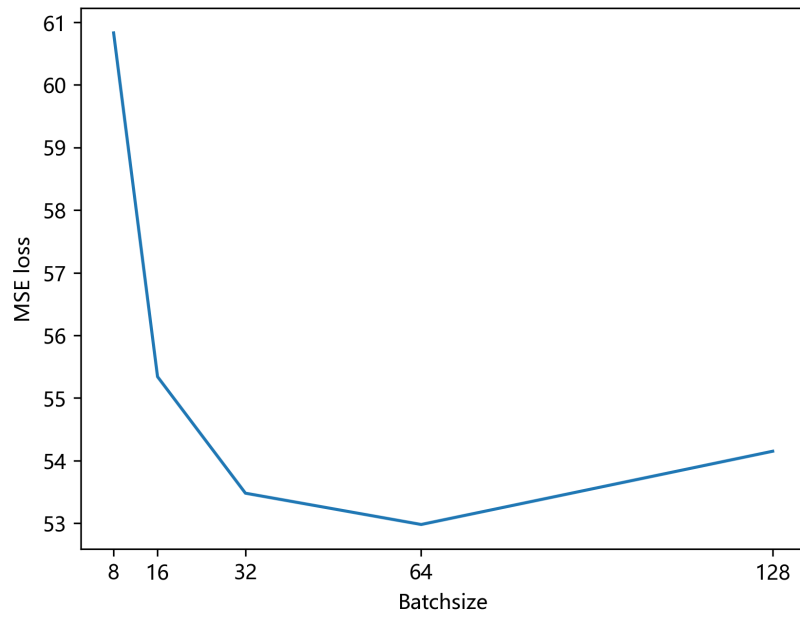

108

109 **Figure S3.** The impact of batch size on the MSE loss of GeoNet prediction.

110

111

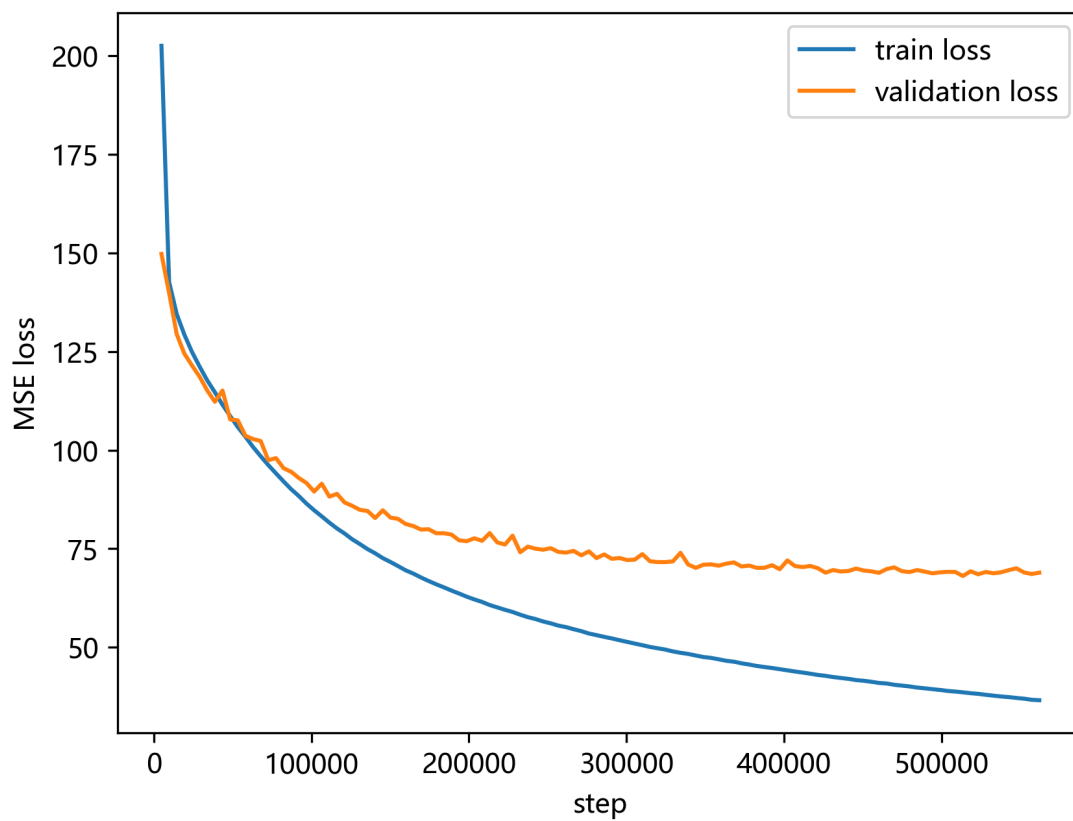

112

113 **Figure S4.** The learning curve of model loss in validation and training datasets for different steps.

114



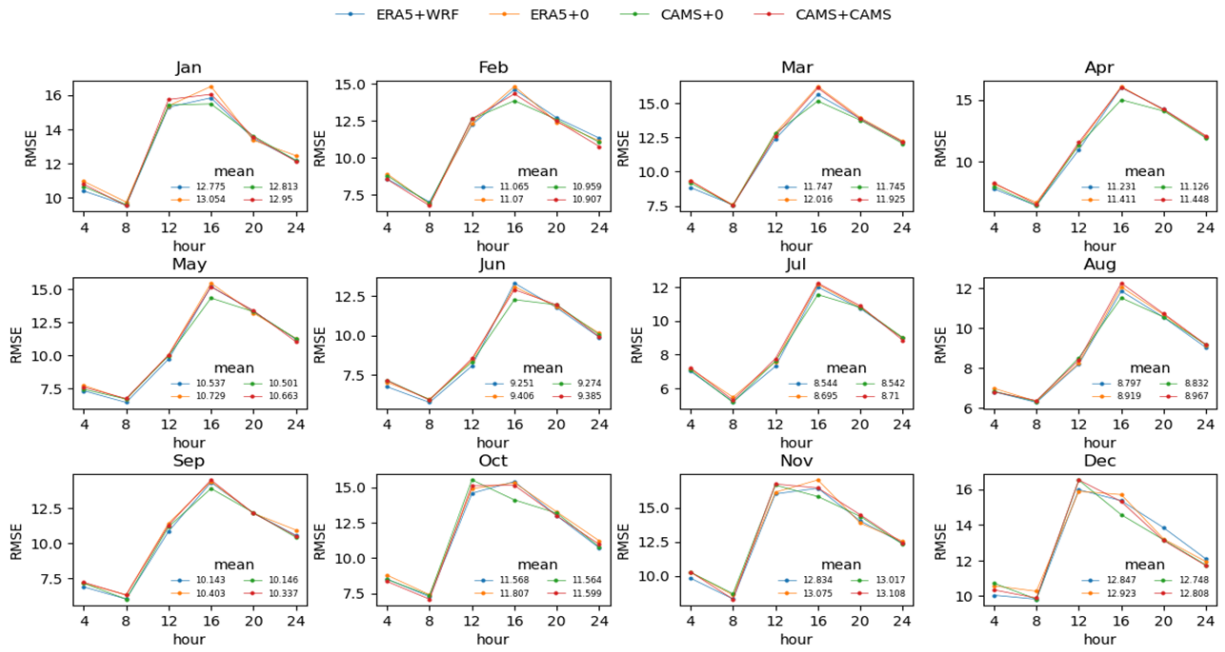

116  
 117 **Figure S5.** The RMSE of GeoNet predicted-NO<sub>2</sub> varies with different prediction step from t+4h to t+24h,  
 118 for different months.

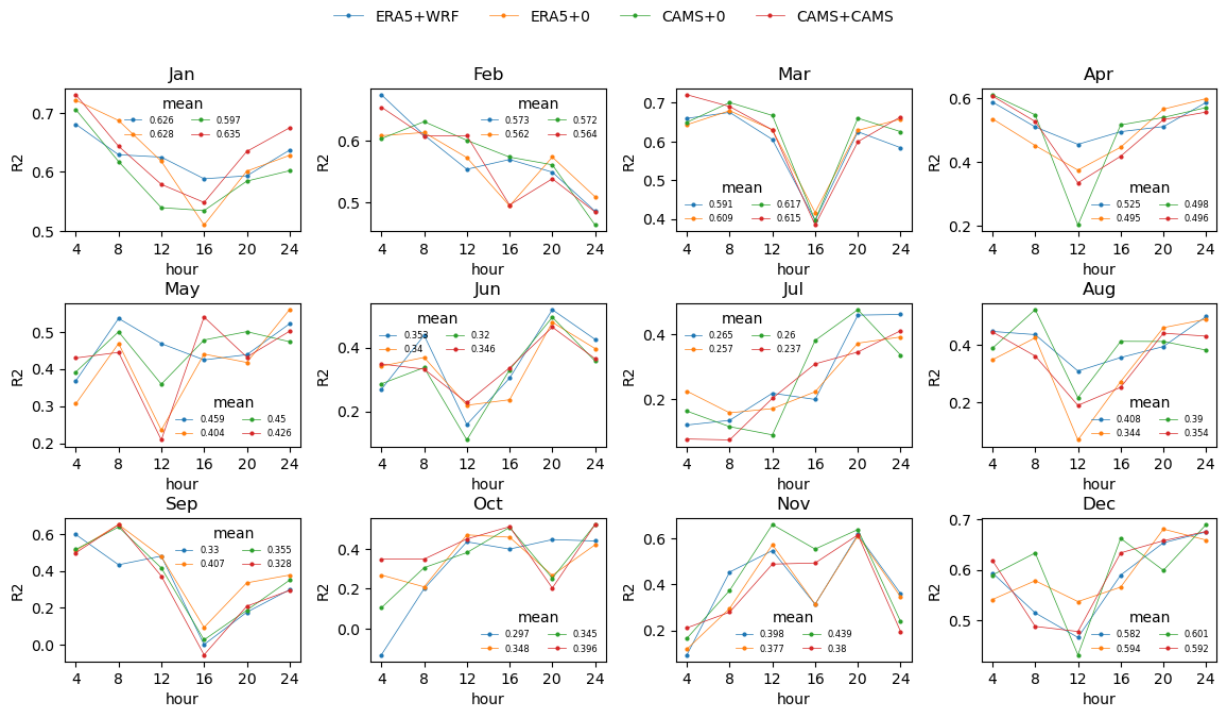

121

122

Figure S6. Similar to Fig. S5, but for  $R^2$ .

123

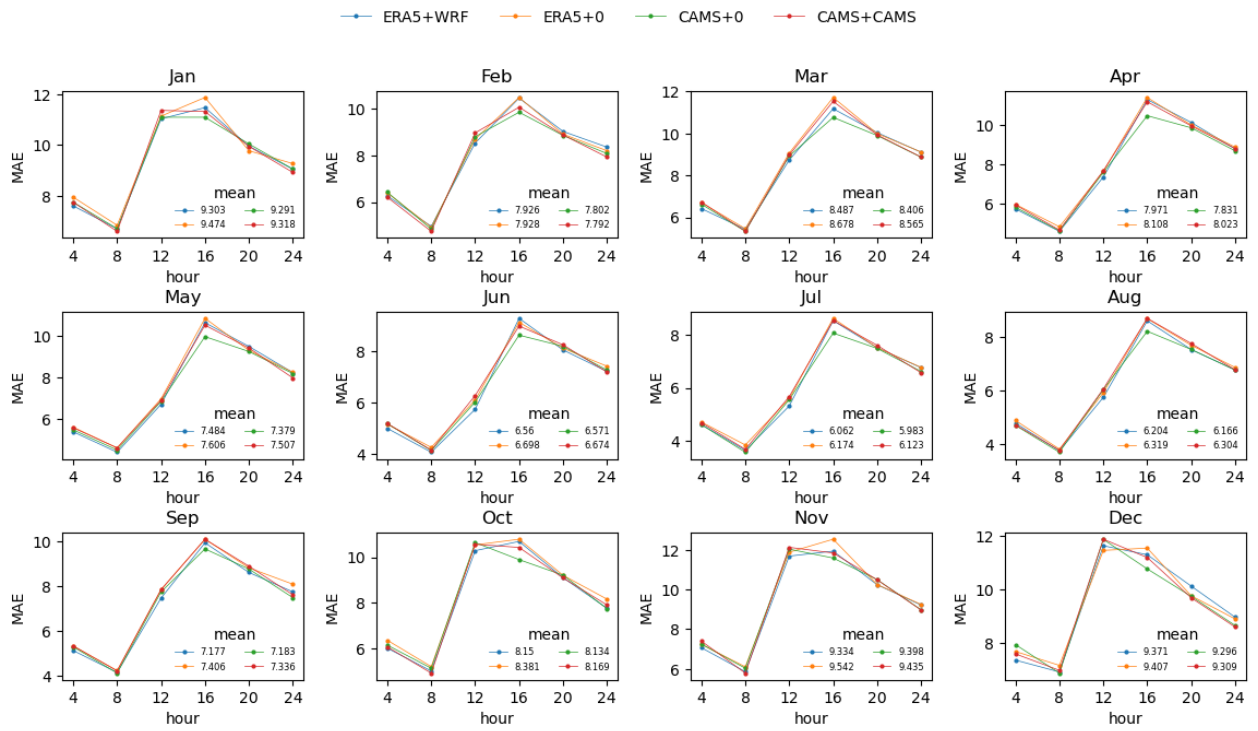

Figure S7. Similar to Fig. S5, but for MAE.

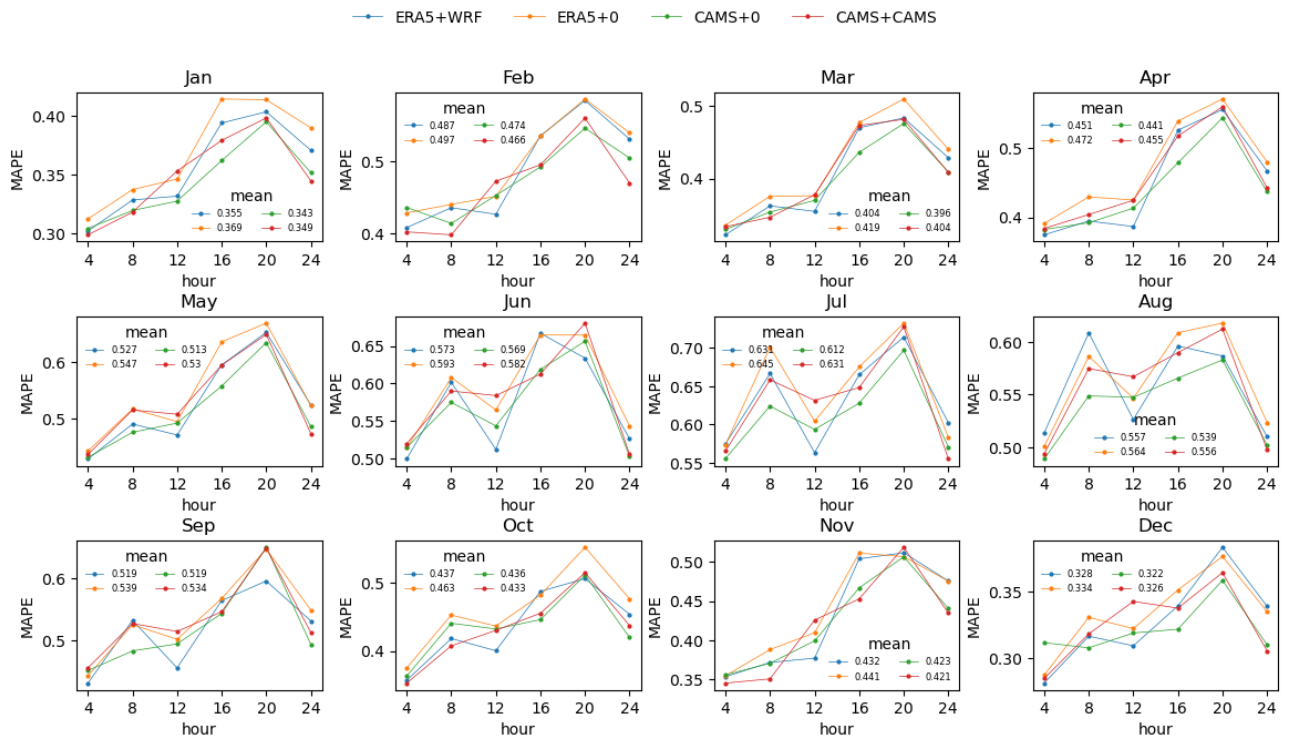

129

130

Figure S8. Similar to Fig. S5, but for MAPE.

131

132

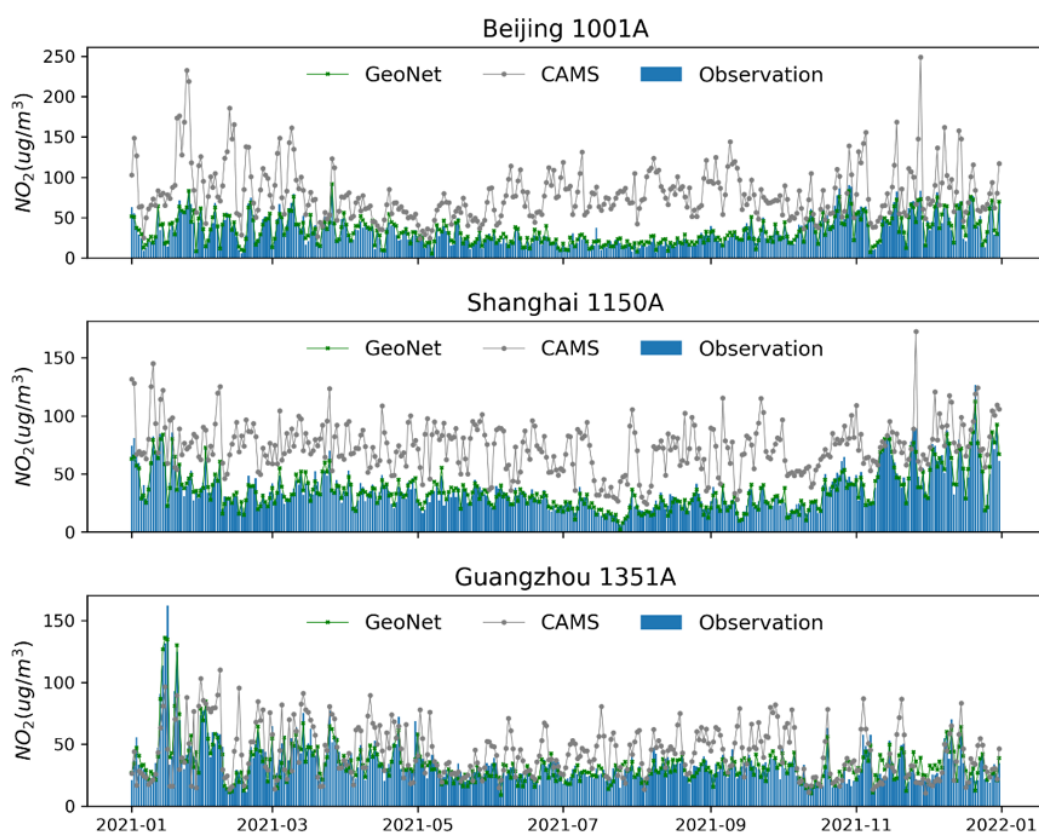

134

135 **Figure S9.** Time series comparison of daily t+4h prediction of surface NO<sub>2</sub> concentration among GeoNet  
 136 and CAMS prediction, as well as the CNEMC measurements. These results are shown for one typical site in  
 137 (a) Beijing, (b) Shanghai, and (c) Guangzhou, respectively.

138

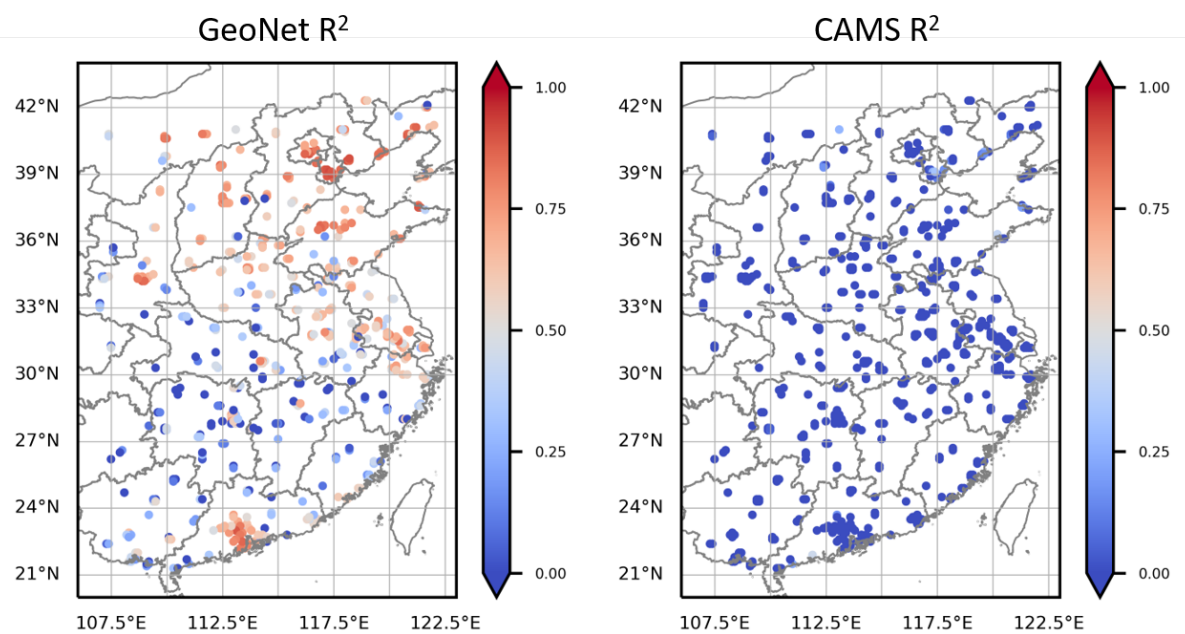

140  
141 **Figure S10.** The site-specific Pearson's  $R^2$  between the CNEMC measurements and NO<sub>2</sub> prediction by (a)  
142 GeoNet, and (b) CAMS over East China.

143

144

145

146

147

148

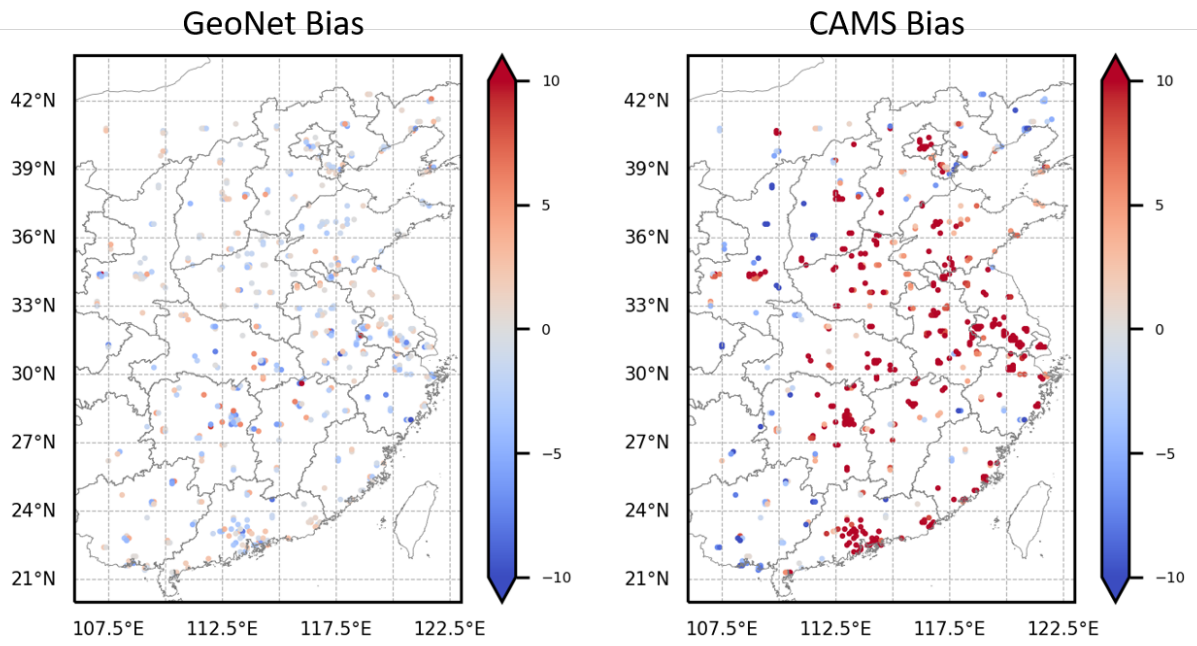

150  
151 **Figure S11.** Similar to Fig. S10, but for RMSE.  
152  
153

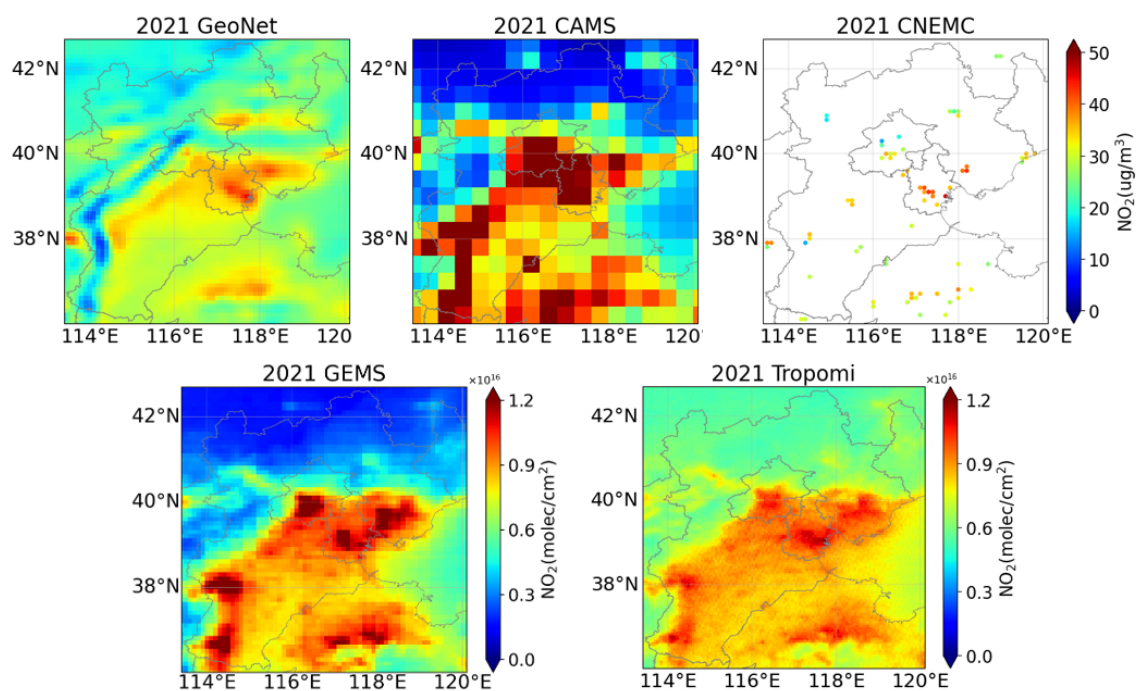

155  
156 **Figure S12.** The comparisons of annual NO<sub>2</sub> distribution among GeoNet, CAMS, and CNEMC (top panel),  
157 as well as the tropospheric NO<sub>2</sub> column from GEMS and TROPOMI over East China in 2021 (bottom panel).  
158  
159
